# Supplementary material
Source: ML conference proceedings conference paper supplement (https://openaccess.thecvf.com/content/CVPR_2020/html/Benzine_PandaNet_Anchor-Based_Single-Shot_CVPR_2020_paper.html)
Supplement: Supplementary file 1 [file 05557-supp.pdf › 05557-supp.pdf]

## **Supplementary Material of ”PandaNet : Anchor-Based Single-Shot Multi-Person 3D Pose Estimation”**

Abdallah Benzine<sup>\*,†</sup>, Florian Chabot<sup>\*</sup>, Bertrand Luvison<sup>\*</sup>, Quoc Cuong Pham<sup>\*</sup>, Catherine Achard<sup>†</sup>

<sup>\*</sup> CEA LIST Vision and Learning Lab for Scene Analysis

<sup>†</sup> Sorbonne University, CNRS, Institute for Intelligent Systems and Robotics

In this supplementary material, we present more qualitative results that could not be included in the main manuscript due to lack of space.

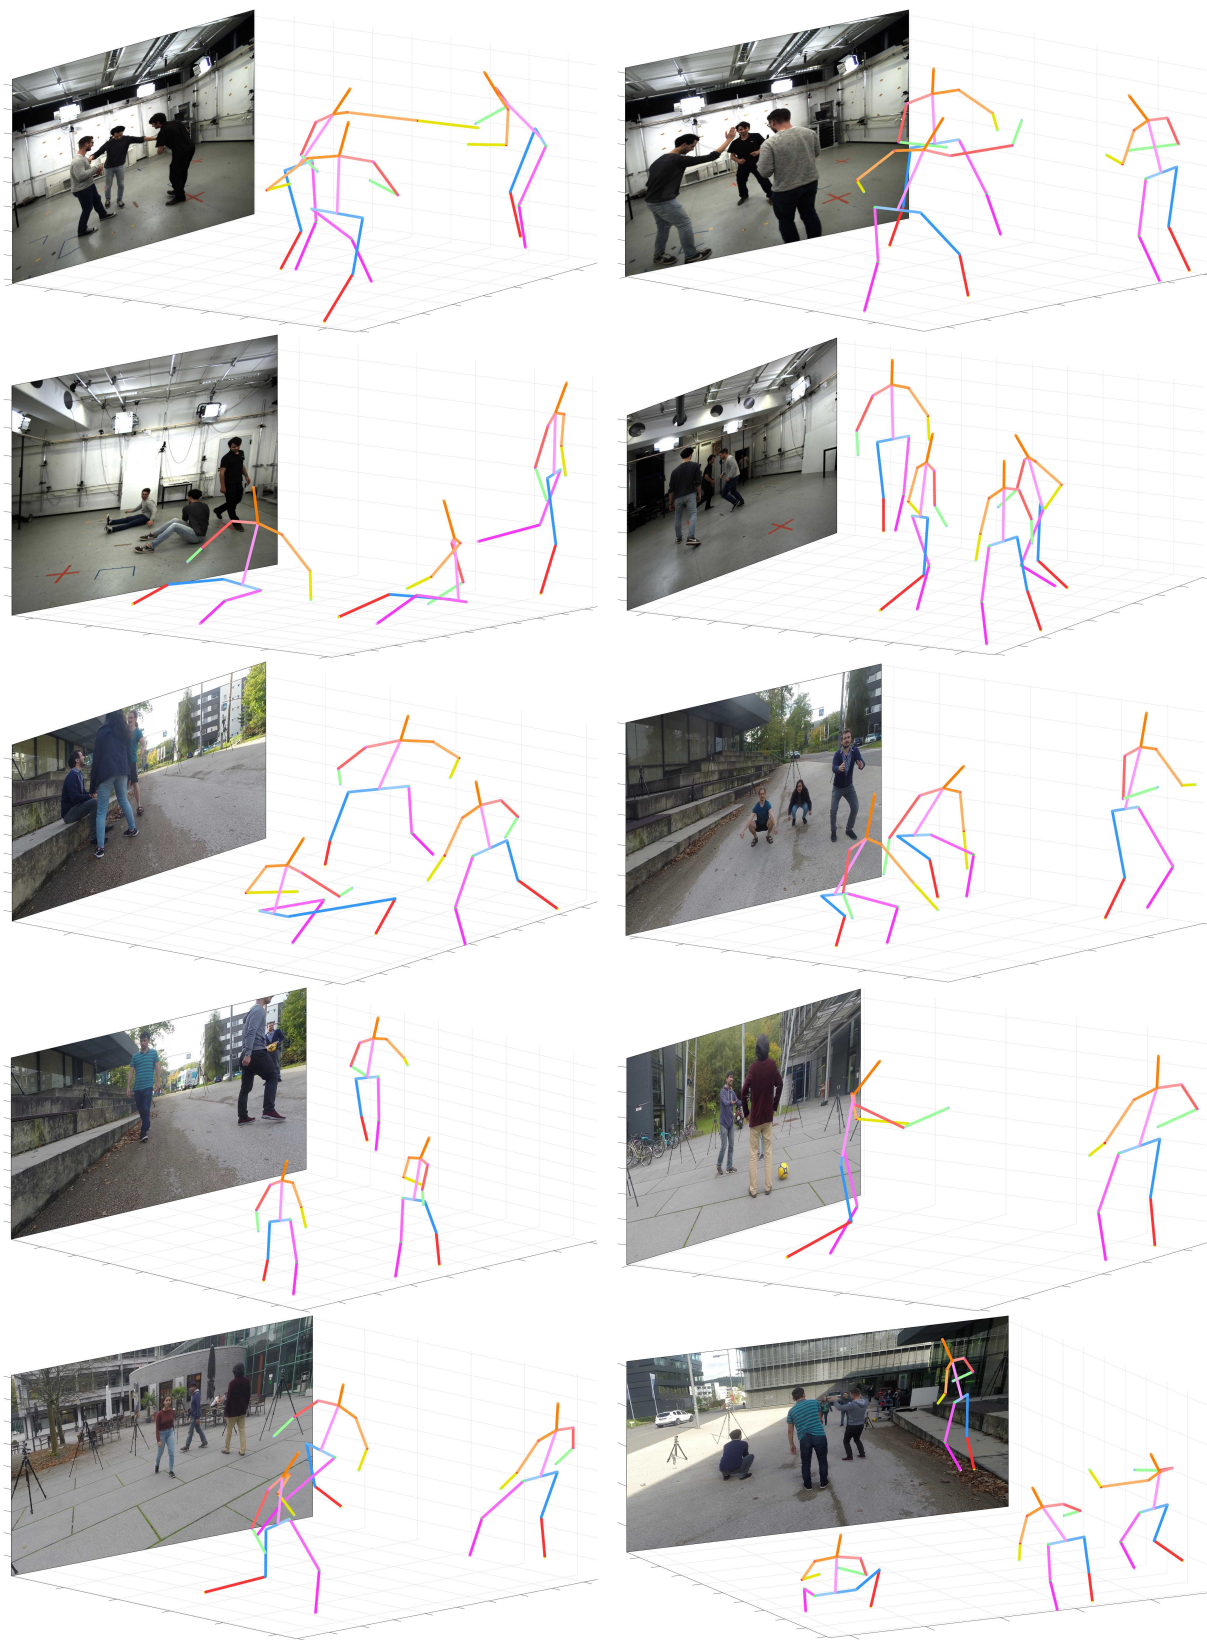

Figure 1: Multi-person 3D poses predicted by our approach on images from MuPoTS-3D dataset. Best viewed in color.

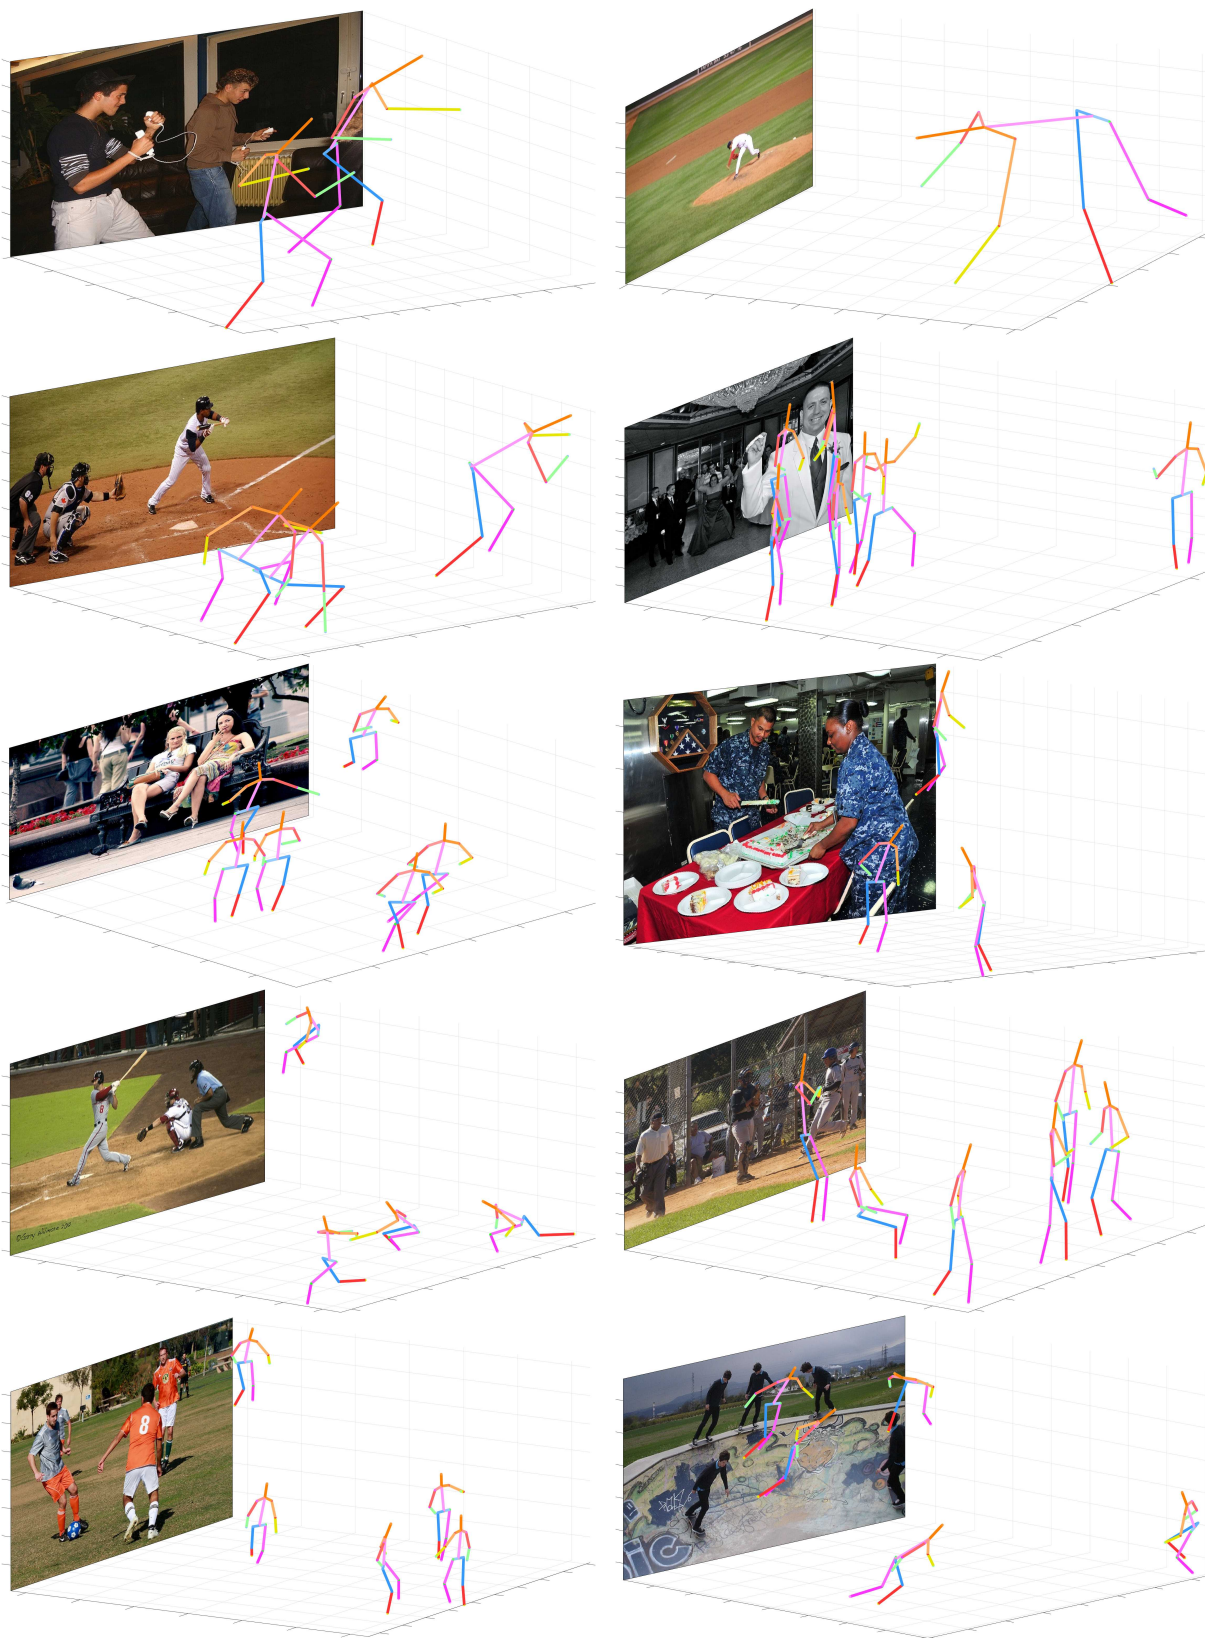

Figure 2: Multi-person 3D poses predicted by PandaNet on images from COCO Val dataset. Best viewed in color.

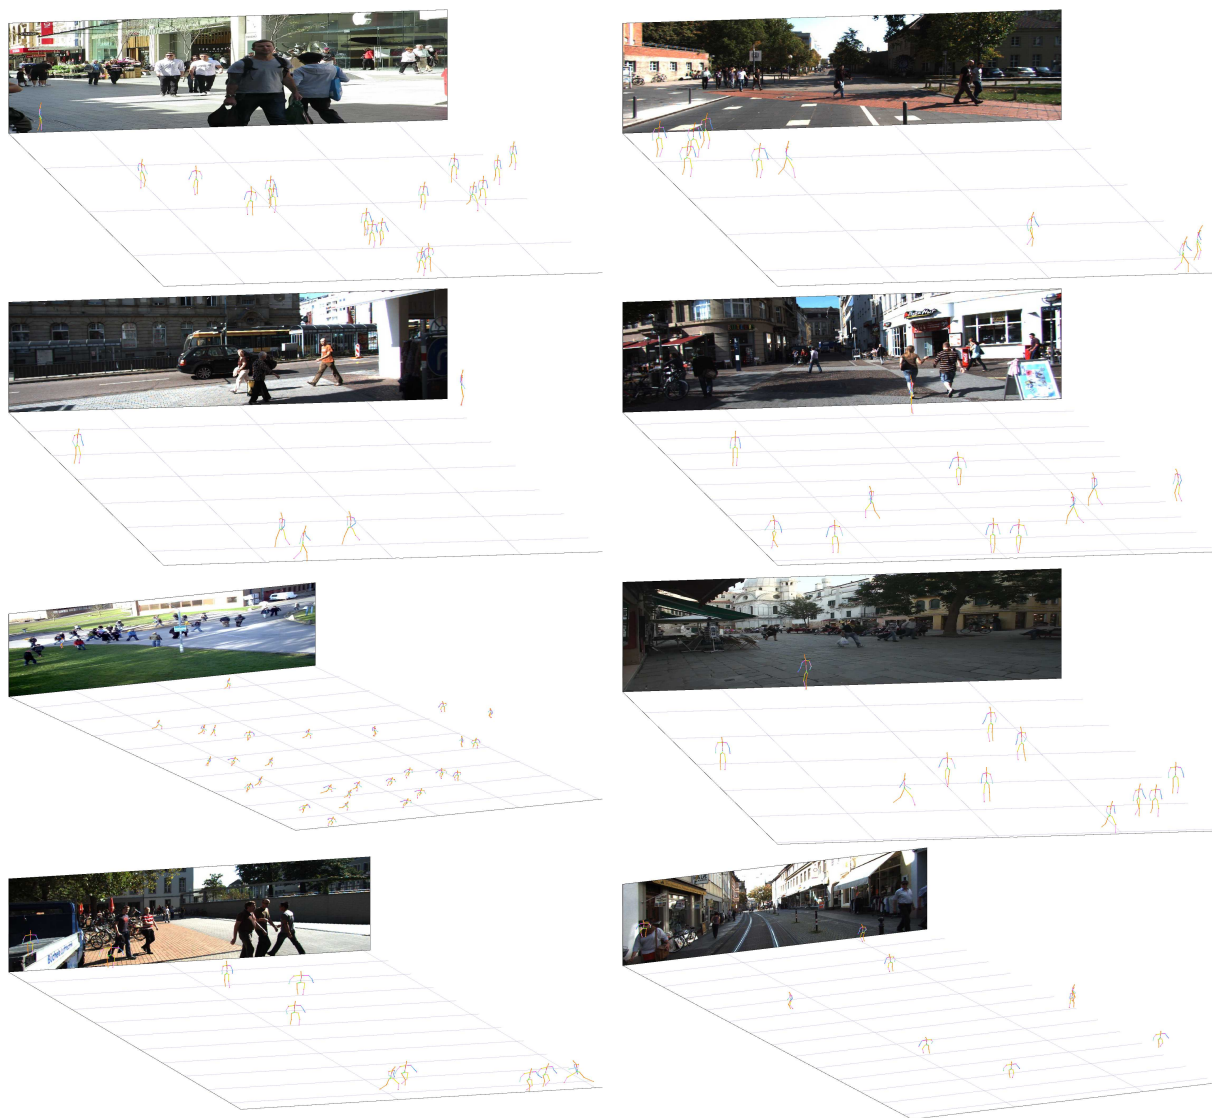

Figure 3: Multi-person 3D poses predicted by PandaNet on images from MOT dataset. The model has only been trained on synthetic images from JTA dataset. Best viewed electronically.
